# Supplementary material for: Haplotype-resolved genome of diploid ginger (Zingiber officinale) and its unique gingerol biosynthetic pathway
Source: PubMed Central journal article supplement (PMC8342499; doi:10.1038/s41438-021-00627-7), 2021-08-05
Supplement: 41438_2021_627_MOESM3_ESM.pdf [file 41438_2021_627_MOESM3_ESM.pdf]

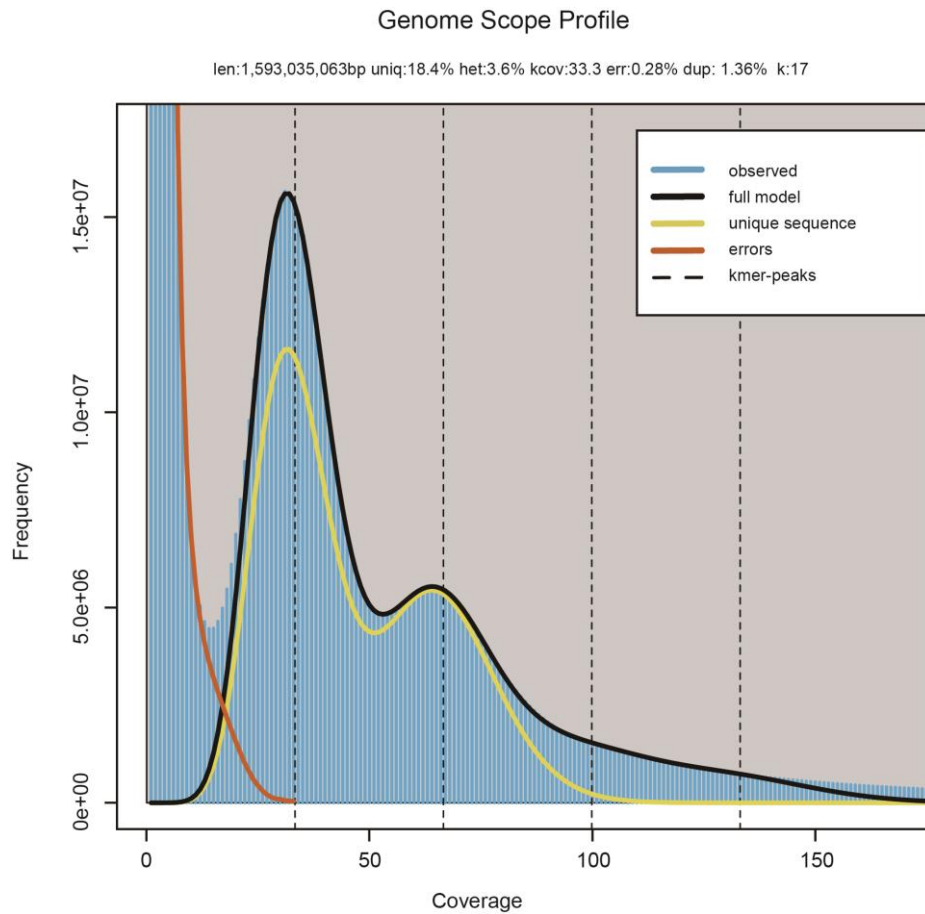

**Supplementary Fig. S2** Genome size estimation of ginger by GenomeScope. The ginger genome was estimated to be 1.59 Gb with 3.6% heterozygosity at 17-mer.
