# Supplementary material for: Haplotype-resolved genome of diploid ginger (Zingiber officinale) and its unique gingerol biosynthetic pathway
Source: PubMed Central journal article supplement (PMC8342499; doi:10.1038/s41438-021-00627-7), 2021-08-05
Supplement: 41438_2021_627_MOESM5_ESM.pdf [file 41438_2021_627_MOESM5_ESM.pdf]

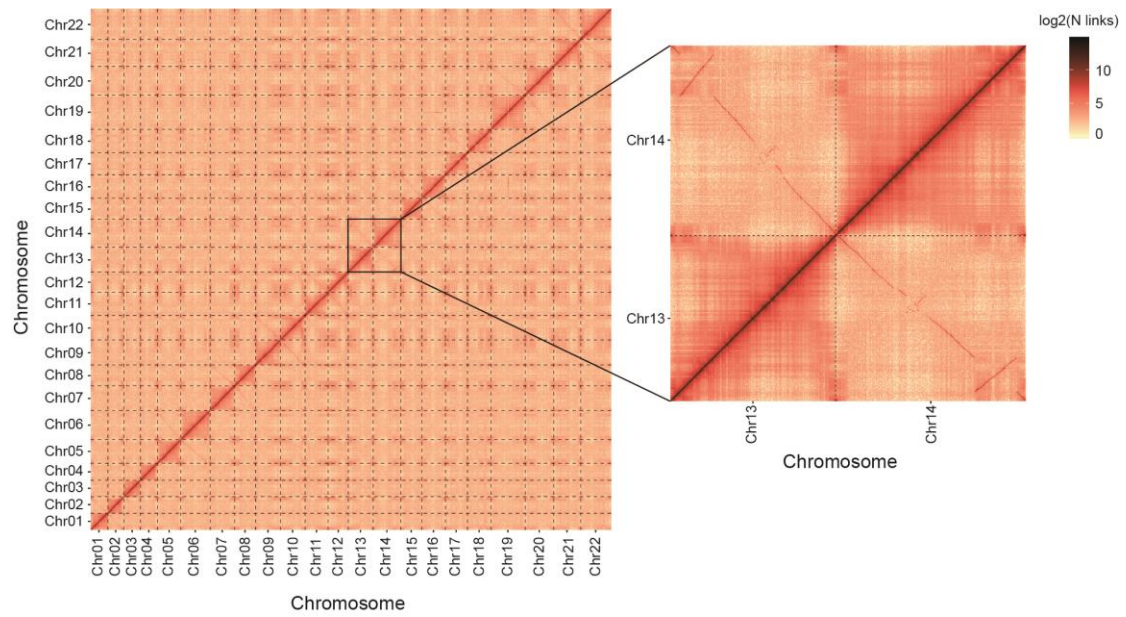

**Supplementary Fig. S4** Overview of Hi-C heatmap (A) of the ginger genome showing genome-wide all-by-all interactions. (B) An enlarged graph exhibiting a representative fragmental inversion in chromosomes 13 and 14.
