# Supplementary material for: Haplotype-resolved genome of diploid ginger (Zingiber officinale) and its unique gingerol biosynthetic pathway
Source: PubMed Central journal article supplement (PMC8342499; doi:10.1038/s41438-021-00627-7), 2021-08-05
Supplement: 41438_2021_627_MOESM12_ESM.pdf [file 41438_2021_627_MOESM12_ESM.pdf]

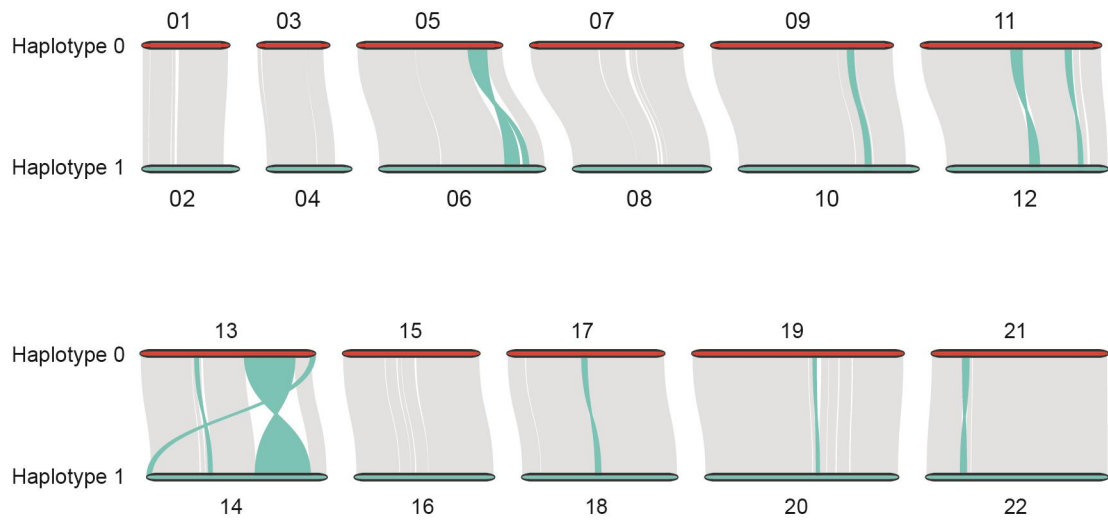

**Supplementary Fig. S11** Genomic alignments between ginger haplotype 1 and haplotype 0. The gray lines represent conserved gene arrays between the two haplotypes. The inverted regions are marked with green ribbons.
