# Supplementary material for: Haplotype-resolved genome of diploid ginger (Zingiber officinale) and its unique gingerol biosynthetic pathway
Source: PubMed Central journal article supplement (PMC8342499; doi:10.1038/s41438-021-00627-7), 2021-08-05
Supplement: 41438_2021_627_MOESM13_ESM.pdf [file 41438_2021_627_MOESM13_ESM.pdf]

Inter-genomic comparison: haplotype0  
vs haplotype1 (21,082 gene pairs)

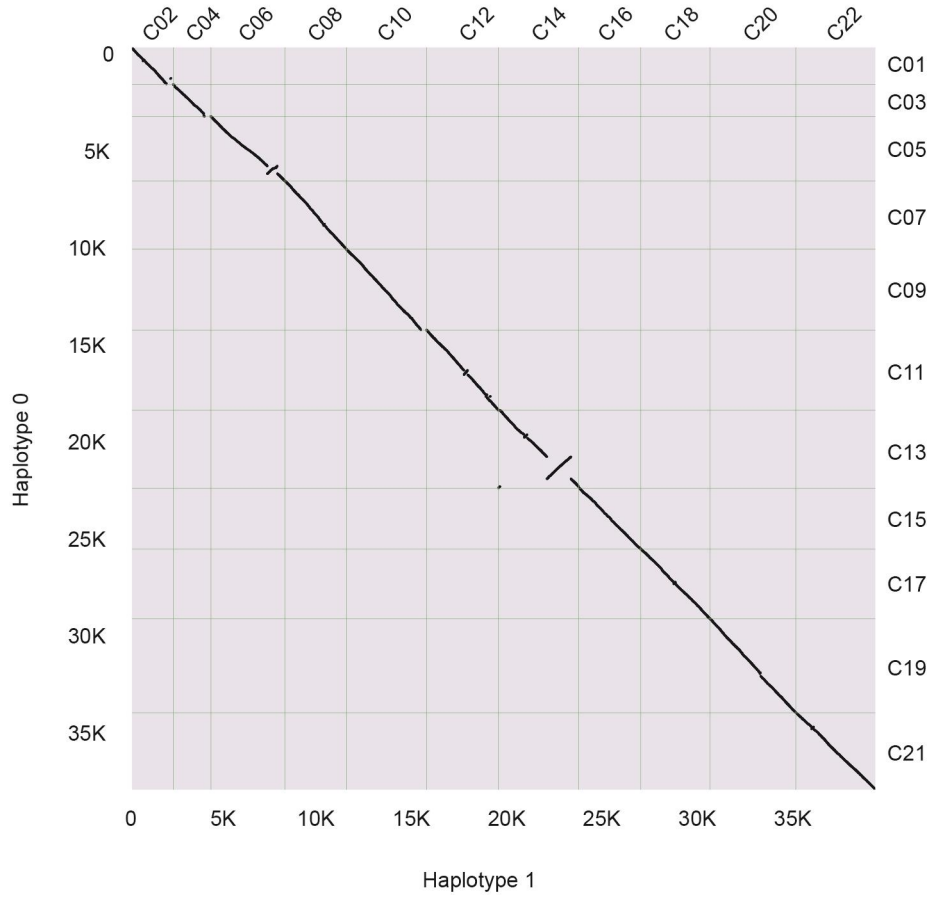

**Supplementary Fig. S12** Inter-genomic comparison identified several inverted regions between the two haplotypes.
