# Supplementary material for: Haplotype-resolved genome of diploid ginger (Zingiber officinale) and its unique gingerol biosynthetic pathway
Source: PubMed Central journal article supplement (PMC8342499; doi:10.1038/s41438-021-00627-7), 2021-08-05
Supplement: 41438_2021_627_MOESM16_ESM.pdf [file 41438_2021_627_MOESM16_ESM.pdf]

Expression ratio of allele DEGs, log10

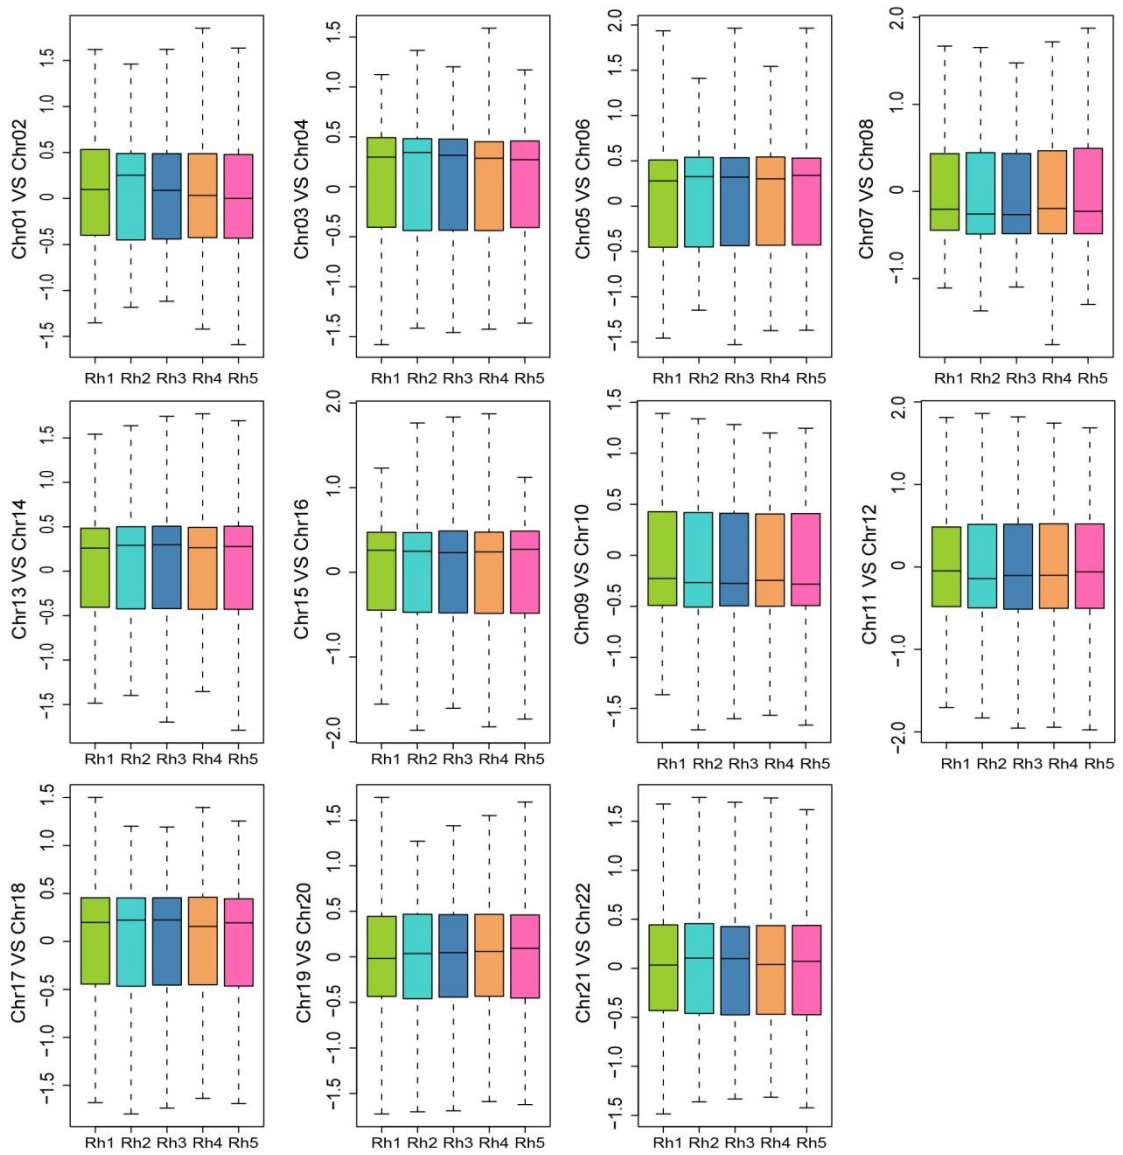

**Supplementary Fig. S15** Ratio of the differentially expressed allelic genes in paired chromosomes of haplotype 0 and haplotype 1.
