# Supplementary material for: Haplotype-resolved genome of diploid ginger (Zingiber officinale) and its unique gingerol biosynthetic pathway
Source: PubMed Central journal article supplement (PMC8342499; doi:10.1038/s41438-021-00627-7), 2021-08-05
Supplement: 41438_2021_627_MOESM25_ESM.pdf [file 41438_2021_627_MOESM25_ESM.pdf]

A

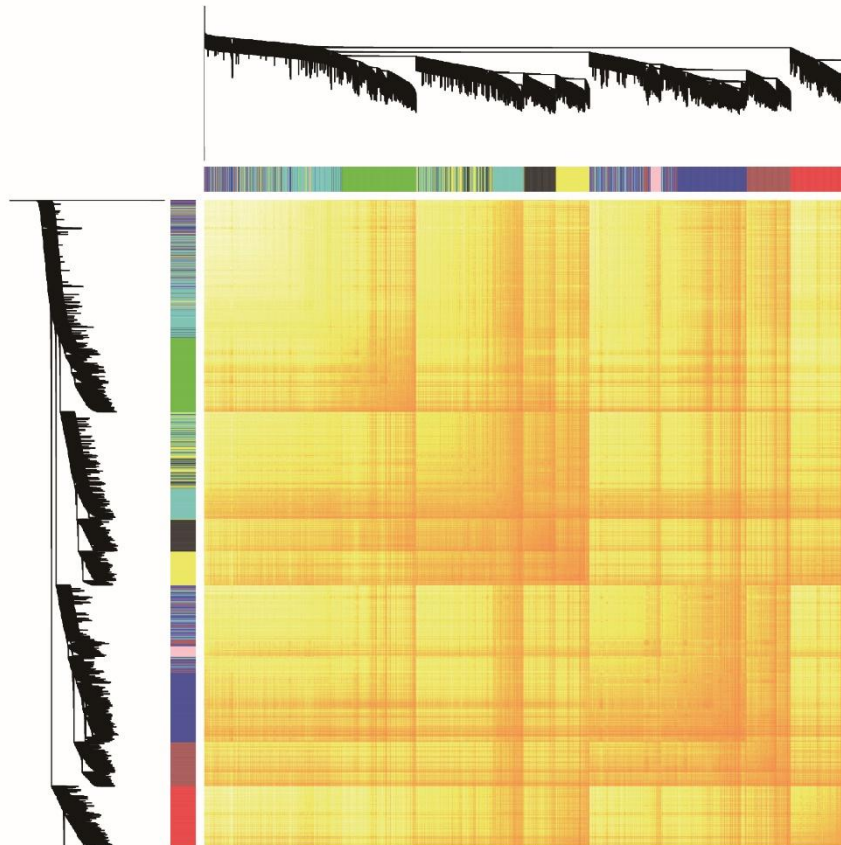

B

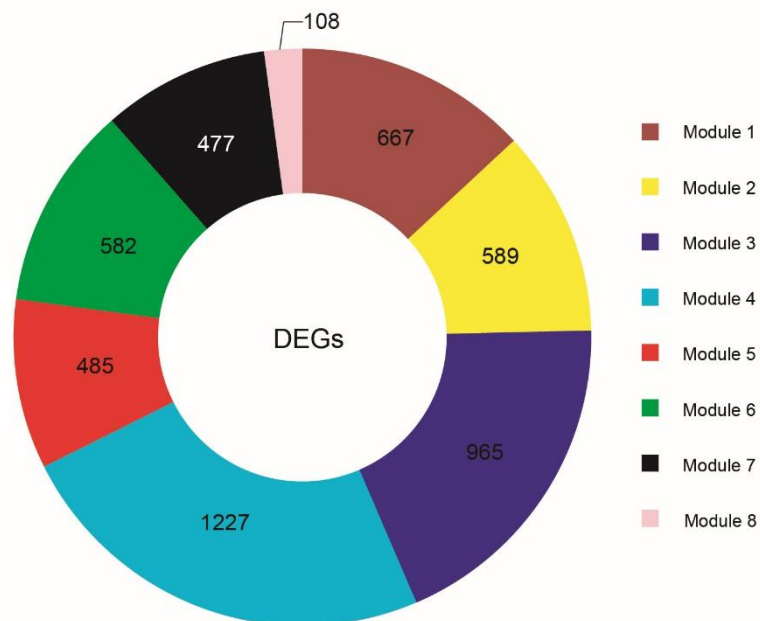

**Supplementary Fig. S24** Gene co-expression among the five rhizome developmental stages. (A) Heat maps depicting DEGs in rhizome were organized among 8 modules. (B) DEGs are non-randomly distributed across 8 modules. The different colors of the regions correspond to the different modules.
