# Supplementary material for: Haplotype-resolved genome of diploid ginger (Zingiber officinale) and its unique gingerol biosynthetic pathway
Source: PubMed Central journal article supplement (PMC8342499; doi:10.1038/s41438-021-00627-7), 2021-08-05
Supplement: 41438_2021_627_MOESM27_ESM.pdf [file 41438_2021_627_MOESM27_ESM.pdf]

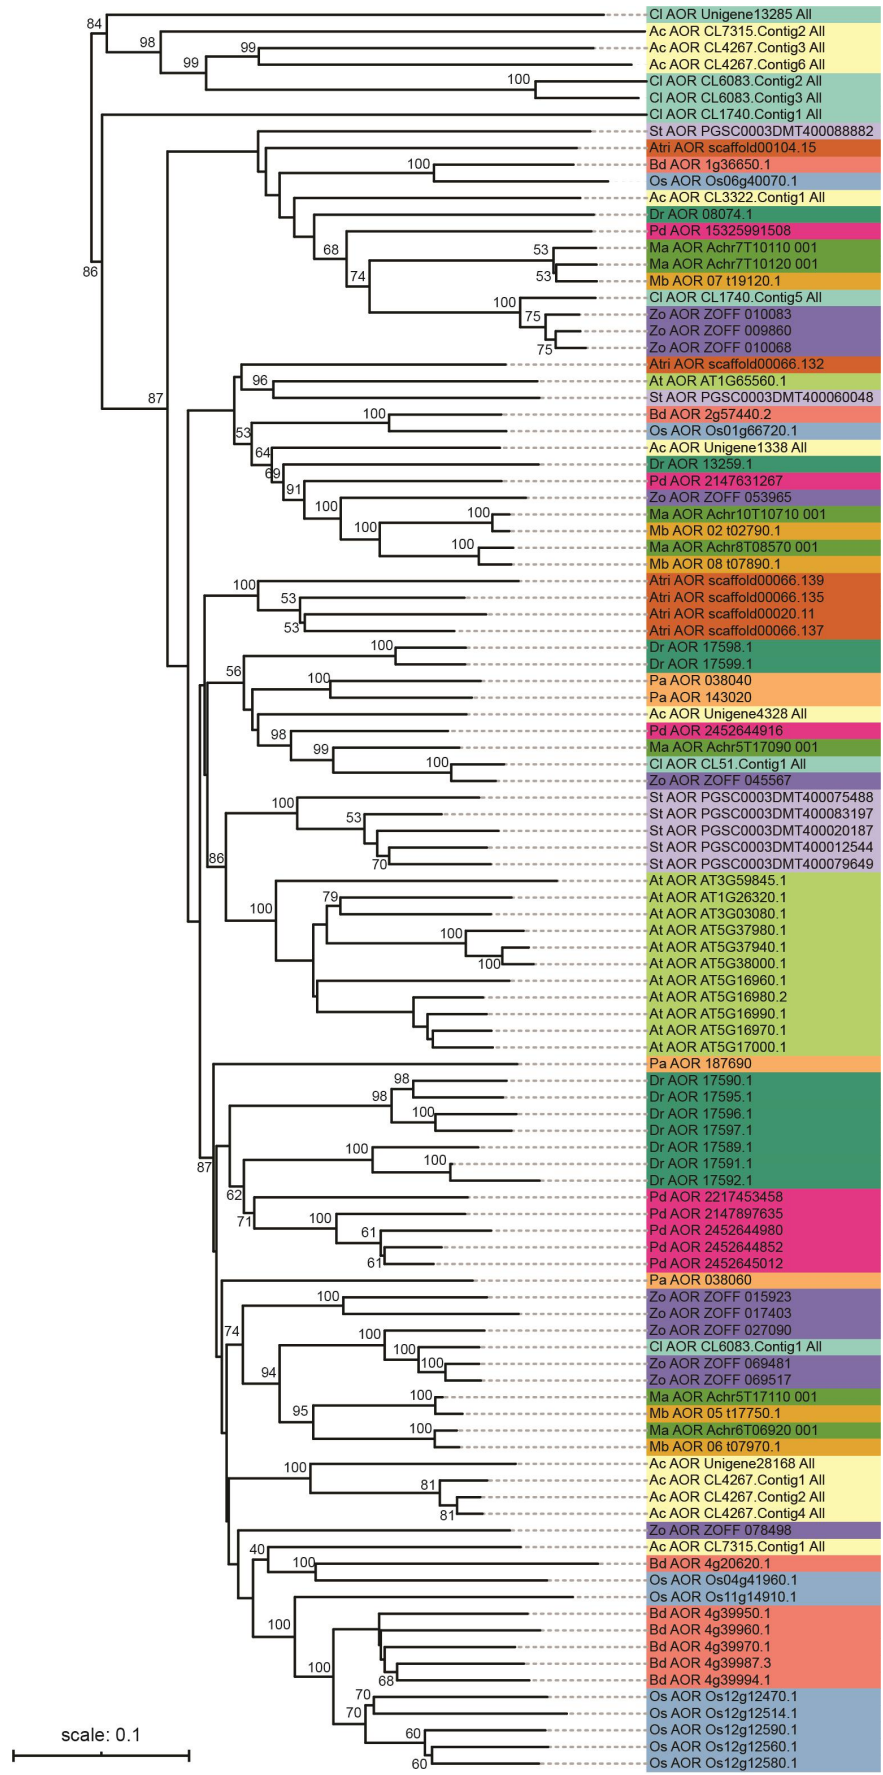

**Supplementary Fig. S26** Phylogenetic analysis of the *AOR* gene family. The unrooted neighbor-joining (NJ) tree of 106 *AOR* genes in 13 plant species which include *B. distachyon*, *D. rotundata*, *P. aphrodite*, *P. dactylifera*, *A. calamus*, *C. longa*, *A. thaliana*, *S. tuberosum*, *M. acuminata*, *M. balbisiana*, *O. sativa*, *Z. officinale*, and *A. trichopoda*. Bootstrap values were shown for each branch. Genes on branch ends from different species were denoted by different colors.
