# Supplementary material for: Haplotype-resolved genome of diploid ginger (Zingiber officinale) and its unique gingerol biosynthetic pathway
Source: Hortic Res. 2021 Aug 5;8:189. doi: 10.1038/s41438-021-00627-7 (PMC8342499; doi:10.1038/s41438-021-00627-7)
Supplement: Supplementary file 21 — Supplementary Fig. S20 [file 41438_2021_627_MOESM21_ESM.pdf]

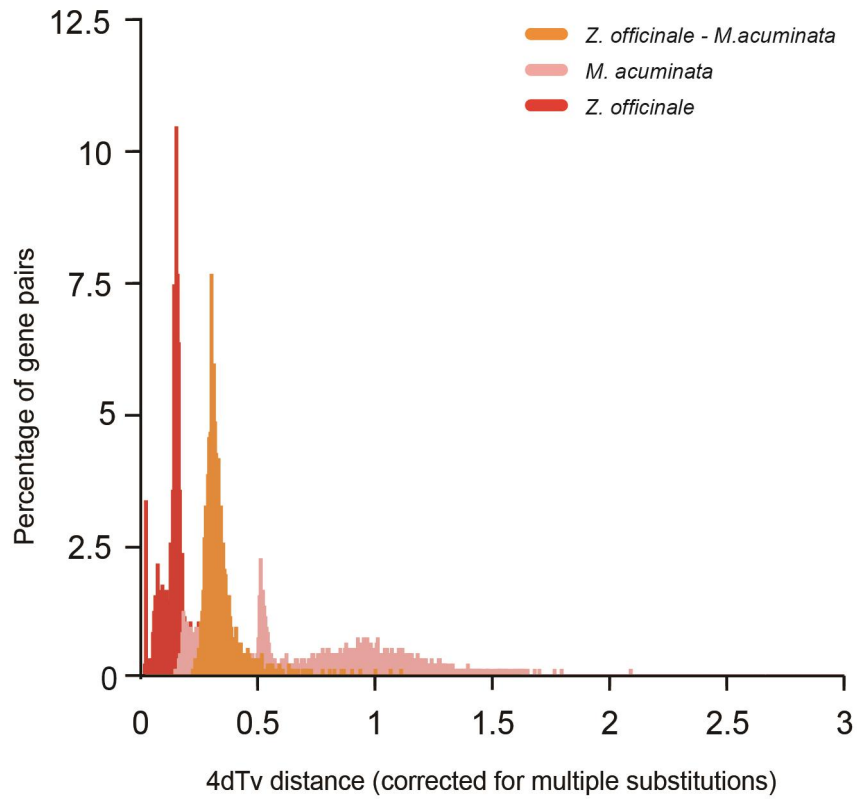

**Supplementary Fig. S20** Distribution of transversions at four-fold degenerate sites (4dTv) of *Z. officinale*. Recent WGD occurred in the evolutionary history of *M. acuminata* and *Z. officinale*.
